# Supplementary material for: Anomalies in the Carbonate System of Red Sea Coastal Habitats
Source: Copernicus journal article supplement (doi:10.5194/bg-2019-200), 2019-06-03
Supplement: Supplementary file 1 [file Tables S3 to S8.xlsx]

## Sheet: Table S3
Table S3. By habitat group statistics for regressions of different variables against D constructed with observations from offshore waters and the four habitat types. Pearsons correlation coefficient (r2), the test statistic (F) and p-value (p) are reported for each individual test.
		Offshore					Transition Water					Coral Reef					Seagrass Meadow					Mangrove Forest
		intercept	slope	r2	F	p	intercept	slope	r2	F	p	intercept	slope	r2	F	p	intercept	slope	r2	F	p	intercept	slope	r2	F	p
S		37.62 (0.14)	0.001471 (0.000086)	0.76	289.6	<0.001	37.17 (0.17)	1.588 (0.130) E-03	0.8	149.2	<0.001	3.667 (0.022) E+01	1.951 (0.156) E-03	0.7	157.3	<0.001	37.45 (0.52)	1.934 (0.400) E-03	0.41	23.38	<0.001	39.11 (1.27)	1.897 (1.036) E-03	0.16	3.35	0.084
T		32.49 (0.76)	-0.003550 (0.000575)	0.3	38.17	<0.001	30.89 (0.59)	- 3.958 (0.441) E-03	0.69	80.74	<0.001	34.05 (0.90)	- 5.537 (0.640) E-03	0.58	74.78	<0.001	35.59 (1.17)	- 7.095 (0.906) E-03	0.68	61.27	<0.001	36.74 (1.69)	- 8.673 (1.378) E-03	0.7	39.59	<0.001
TA		2408 (0.005)	0.04971 (0.00419)	0.61	140.7	<0.001	2380 (23)	6.619 (1.720) E-02	0.28	14.81	<0.001	2343 (21)	7.576 (1.564) E-02	0.27	23.45	<0.001	2303 (20)	7.338 (1.535) E-02	0.4	22.86	<0.001	3465 (575)	-4.874 (4.694) E-01	0.06	1.08	0.314
DIC		2027 (5)	0.04374 (0.00412)	0.56	112.9	<0.001	2035 (9)	5.570 (0.671) E-02	0.64	68.84	<0.001	1967 (15)	7.55 (1.12) E-02	0.4	45.45	<0.001	1949 (53)	7.714 (4.062) E-02	0.09	3.61	0.066	3163 (546)	- 5.192 (4.456) E-01	0.07	1.36	0.26
pH		8.011 (0.011)	0.0003517 (0.00000839)	0.16	17.56	<0.001	7.989 (0.030)	4.259 (2.261) E-05	0.09	3.6	0.067	7.969 (0.028)	5.717 (2.022) E-05	0.13	8	0.006	7.894 (0.03)	7.066 (2.357) E-05	0.24	8.99	0.005	7.657 (0.347)	1.503 (2.832) E-04	0.02	0.28	0.602
pCO2		427.2 (10.7)	- 0.02988 (0.00812)	0.13	13.54	<0.001	464.2 (28.1)	- 4.052 (2.113) E-02	0.09	3.7	0.063	470.6 (27.4)	- 5.223 (1.963)	0.12	7.1	0.01	563.9 (40.4)	- 7.565 (0.031)	0.17	5.79	0.023	2917 (1170)	-1.232 (0.955)	0.09	1.67	0.214
ΩAr		4.332(0.081)	- 0.00007586 (0.00006176)	0.02	1.51	0.223	3.942 (0.267)	- 4.114 (20.07) E-05	0	0.04	0.839	4.104 (0.320)	- 1.027 (2.292) E-04	0	0.2	0.656	3.723 (0.260)	- 1.634 (2.026) E-04	0.02	0.65	0.427	4.115 (3.958)	1.64 (32.29) E-04	0	0	0.96
rTA							1.039 (25.840)	8.767 (19.34)	0.01	0.21	0.653	2.357 (28.114)	- 8.233 (20.477) E-03	0	0.16	0.689	- 91.81 (37.60)	- 8.185 (28.88) E-03	0	0.08	0.779	961.8 (518.1)	- 0.561 (0.422)	0.09	1.76	0.202
rDIC							31.69 (12.84)	5.470 (9.612) E-03	0.01	0.32	0.573	- 12.37 (16.78)	8.207 (12.110) E-03	0	0.46	0.5	- 67.34 (58.68)	6.11 (45.08) E-03	0	0.02	0.893	1055 (486)	- 5.834 (3.966) E-01	0.11	2.16	0.16
rpH							- 5.023 (2.977) E-02	2.490 (2.237) E-05	0	0.01	0.912	- 2.636 (3.511) E-02	- 2.673 (25.150) E-06	0	0.01	0.916	-7.209 (3.789) E-02	- 1.248 (2.947) E-05	0.01	0.18	0.675	-2.777 (3.541) E-01	4.26 (28.89) E -05	0	0.02	0.885
rpCO2							70.75 (28.12)	- 9.262 (21.138) E-03	0.01	0.19	0.664	35.92 (34.25)	- 3.29 (24.53) E-03	0	0.02	0.894	96.95 (48.65)	- 5.90 (37.85) E-03	0	0.02	0.877	2399 (1166)	-1.131 (0.951)	0.08	1.41	0.251
rΩAr							- 0.3000 (0.2672)	2.387 (20.09) E-05	0	0.01	0.906	- 1.919 (3.075) E-01	- 2.467 (2.202) E-04	0	0.01	0.911	- 6.608 (2.494) E-01	-5.58 (19.40) E-05	0	0.09	0.772	- 4.38 (39.56) E-01	- 5 (3228) E-06	0	0	0.999
nTA		2238 (5)	-0.037 (0.004)	0.48	<0.001	<0.001
nDIC		1884 (7)	-0.030 (0.006)	0.23	27.06	<0.001

## Sheet: Table S4
Table S4. By Habitat descriptive statistics for carbon variable habitat groups for all coastal observations. The number of observations (n), mean, median, standard deviation, maximum values (max) and minimum value (min) are presented for each habitat group and variable combination.
	Habitat group
	Offshore waters	Transition waters	Coral reefs	Seagrass meadows	Mangrove forests
S
n	92	71	100	68	42
Mean	39.46	39.15	39.2	40.24	41.61
Median	39.36	32.21	39.26	40.39	41.62
Standard deviation	0.64	0.74	0.84	1.17	1.5
max	40.54	40.39	40.48	43.9	45.05
min	38.12	37.27	37	37.95	38.65
T
n	92	68	88	63	42
Mean	28.02	27.38	27.53	27.93	28.99
Median	28.09	27.56	27.24	29.08	29.94
Standard deviation	2.49	2.96	3.14	3.9	4.44
max	31.78	32.76	32.11	33.74	36.76
min	22.83	22.85	27.77	17.41	19.48
TA
n	92	71	98	69	42
Mean	2470	2445	2439	2378	2652
Median	2469	2438	2437	2379	2446
Standard deviation	24	70	56	62	634
max	2530	2769	2669	2496	4862
min	2414	2087	2317	2242	2300
DIC
n	92	71	101	69	42
Mean	2082	2086	2063	2017	2298
Median	2082	2089	2064	2045	2114
Standard deviation	22	43	53	104	620
max	2136	2222	2171	2171	4838
min	2042	1931	1910	1555	1957
pH
n	92	68	85	63	42
Mean	8.055	8.026	8.04	8	7.897
Median	8.043	8.024	8.041	7.994	7.899
Standard deviation	0.333	0.086	0.073	0.072	0.359
max	8.144	8.378	8.349	8.262	9.723
min	7.994	7.594	7.863	7.815	7.237
pCO2
n	92	68	85	63	42
Mean	389.6	429.9	407.8	438	963
Median	389.1	418.8	403	426	571
Standard deviation	31.6	109.4	79.1	84	1314
max	460.3	1148.6	644.8	711	6281
min	308.3	-166.9	163.1	197	1
ΩAr
n	92	68	85	63	42
Mean	4.236	3.933	4.034	3.757	4.404
Median	4.286	3.958	3.839	3.672	3.525
Standard deviation	0.226	0.63	0.668	0.612	5.26
max	4.757	7.185	7.76	6.415	28.202
min	3.444	1.696	2.939	2.482	0.926
rTA
n	92	71	97	68	42
Mean	0	-7.17	-12.16	-144.13	43.84
Median	-2.25	-13.66	-27	-138.45	-147.29
Standard deviation	16.79	68.98	61.57	93.14	596.51
max	62.61	309.42	201.03	47.75	2281.22
min	-29.37	-371.1	-119.1	-365.78	-347.12
Percentage of positive anomalies		12.7	17.8	1.4	16.7
Percentage of negative anomalies		15.5	27.7	87	69
rDIC
n	92	71	100	68	42
Mean	0	19.4	-4.63	-109.32	99.96
Median	-5.37	23.26	4.69	-81.54	-72.71
Standard deviation	23.33	40.57	45.49	120.02	580.46
max	85.17	186.18	91.52	110.76	2469.99
min	-30.89	-120.32	-137.7	-498.75	-269.65
Percentage of positive anomalies		8.5	5.9	2.9	33.3
Percentage of negative anomalies		2.8	23.1	55.1	52.4
rpH
n	92	68	85	63	42
Mean	-0.0005	-0.0424	-0.0234	-0.0484	-0.125
Median	0.0036	-0.0346	-0.0438	-0.06	-0.1133
Standard deviation	0.0269	0.0795	0.0783	0.085	0.3695
max	0.0635	0.2773	0.3417	0.2645	1.7019
min	-0.1004	-0.4121	-0.1781	-0.2501	-0.8636
Percentage of positive anomalies		4.2	11.9	2.9	7.1
Percentage of negative anomalies		28.2	20.8	42	57.1
rpCO2
n	92	68	85	63	42
Mean	0.1	54.7	269	33.9	517.11
Median	-4.9	41.4	42.8	32.23	127.31
Standard deviation	30.2	103.9	83.4	105.5	1318.01
max	112.1	710.8	235.1	319.3	5809
min	-54.5	-178.2	-274.9	-259.5	-436.2
Percentage of positive anomalies		25.4	15.8	30.4	57.1
Percentage of negative anomalies		4.2	9.9	11.6	14.3
rΩAr
n	92	68	85	63	42
Mean	0.0006	-0.2678	-0.1777	-0.5586	-5159
Median	0.0268	-0.2747	-0.3509	-0.6199	-1.0096
Standard Deviation	0.1879	0.6257	0.64444	0.5681	3.9263
max	0.5835	3.0286	3.4388	2.0197	23.6204
min	-0.6812	-2.6171	-1.275	-1.6809	-3.5651
Percentage of positive anomalies		5.6	10.9	2.9	2.4
Percentage of negative anomalies		31	26.7	58	69

## Sheet: Table S5
Table S5. Results from one-way WR-ANOVA and corresponding boot-strapped post-hoc t-tests to identify performed between differences in medians between habitat groups ; Offshore (O), Transition waters (T), Coral reefs (C), Seagrass meadows (S) and Mangrove Forests (M). Tests statistics (F for WR-ANOVA and Ψ_hat for post-hoc) and p-values (p) are reported for each individual test.
	S	T	TA	DIC	pH	pCO2	OA	rTA	rDIC	rpH	rpCO2	rOA
One-way ANOVA	55.55, <0.001	2.78, 0.034	16.66, <0.001	3.59, 0.009	7.98, <0.001	3.67, 0.010	24.49, <0.001	30.29, <0.001	13.00, <0.001	2.55,0.052	14.96,<0.001	38.64, <0.001
Post-hoc tests
C vs M	-2.36, <0.001	-2.71, 0.481	-9.06, 0.972	-49.42, 0.768	0.142, <0.001	-168.5, <0.001	0.295, 0.214	120.3, <0.001	77.40, 0.528	0.0695, 0.334	-84.46, 0.835	0.659, <0.001
C vs O	- 0.101, 0.354	-0.85, 0.678	-31.53, <0.001	-17.33, 0.140	- 0.002, 0.563	3.9, 0.661	-0.447, <0.001	-24.8, <0.001	9.96, 0.400	-0.474, <0.001	47.77, <0.001	-0.378, <0.001
C vs S	-1.13, <0.001	-1.84, 0.678	57.73, <0.001	18.99, 0.301	0.047, 0.147	-23.3, 0.311	0.166, 0.331	111.4, <0.001	86.23, <0.001	0.0163, 0.771	10.61, 0.985	0.269, 0.050
C vs T	0.04, 0.778	-0.32, 0.678	- 0.91, 0.972	-25.01, -0.080	0.017, 0.471	-15.83, 0.174	-0.120, 0.484	-13.3, 0.160	-18.57, <0.001	-0.009, 0.771	1.48, 0.985	-0.076, 0.588
M vs O	2.25, <0.001	1.85, 0.678	-22.48, 0.387	32.09, 0.768	-0.143, <0.001	172.4, <0.001	-0.741, <0.001	-145.0, <0.001	-67.44, 0.528	-0.117, <0.001	132.2, 0.164	-1.037, <0.001
M vs S	1.22, <0.001	0.87, 0.678	66.79, <0.001	68.40, 0.200	-0.095, 0.02	145.2, 0.080	-0.128, 0.484	-8.8, 0.775	8.83, 0.952	-0.053, 0.751	95.1, 0.962	-0.390, 0.180
M vs T	2.40, <0.001	2.39, 0.134	8.14, 0.971	24.41, 0.768	-0.125, <0.001	152.7, <0.001	-0.414, 0.100	-133.6, <0.001	-95.97, 0.528	-0.079, 0.301	85.9, 0.835	- 0.735, <0.001
O vs S	-1.03, <0.001	-0.99, 0.678	89.26, <0.001	36.31, 0.00	0.049, <0.001	-27.2, 0.174	0.613, <0.001	136.2, <0.001	76.27, <0.001	0.064, <0.001	-37.16, <0.001	0.647, <0.001
O vs T	0.148, 0.270	0.053, 0.678	30.62, <0.001	-7.68, 0.768	0.019, 0.147	-19.7, <0.001	0.327, <0.001	11.4, 0.301	-28.53, <0.001	0.038, <0.001	-46.29, <0.001	0.302, <0.001
S vs T	1.18, <0.001	1.52, 0.678	-58.64, <0.001	-43.99, <0.001	-0.030, 0.578	7.50, 0.661	-0.286, 0.214	-124.6, <0.001	-104.8, <0.001	-0.025, 0.751	-9.13, 0.985	-0.345, <0.001

## Sheet: Table S6
Table S6. Statistics for regressions of different variables against the seasonal proxy (SP) at the four time series stations. Pearsons correlation coefficient (r2), the test statistic (F) and p-value (p) are reported for each individual test.
	Transition Water			Coral Reef			Seagrass Meadow			Mangrove Forest
	r2	F	p	r2	F	p	r2	F	p	r2	F	p
S	0.03	0.86	0.361	0	0.02	0.898	0.22	7.96	0.009	0.12	2.6	0.124
T	0.93	355.7	<0.001	0.92	339.9	<0.001	0.82	130.4	<0.001	0.77	62.53	<0.001
TA	0.03	1	0.327	0.01	0.39	0.539	0.45	24.44	<0.001	0.03	0.5	0.488
DIC	0.13	4.21	0.049	0	0.04	0.84	0.64	51.71	<0.001	0.02	0.41	0.531
pH	0.13	3.4	0.055	0.12	3.81	0.061	0.09	2.77	0.107	0.14	3.03	0.098
pCO2	0.09	2.82	0.105	0.09	2.8	0.105	0.02	0.7	0.409	0.04	0.78	0.388
ΩAr	0.02	0.64	0.429	0.05	1.44	0.24	0.09	2.81	0.104	0.02	0.35	0.564
rTA	0.02	0.62	0.436	0.24	0.01	0.628	0.5	29.53	<0.001	0.13	2.83	0.109
rDIC	0.11	3.53	0.071	0	7	0.794	0.7	66.48	<0.001	0.07	1.41	0.25
rpH	0	0.03	0.871	0.01	0.33	0.569	0.14	4.67	0.039	0.01	0.15	0.708
rpCO2	0	0.11	0.741	0.01	0.16	0.694	0.26	10.45	0.003	0.02	32	0.582
rΩAr	0	0.1	0.759	0.01	0.36	0.551	0.02	0.604	0.443	0	0.01	0.924

## Sheet: Table S7
Table S7. Descriptive statistics for studied variables at the four time series stations. The number of observations (n), mean, median, standard deviation, maximum values (max) and minimum value (min) are presented for each time series station and variable combination.
	Time Series Station
	Transition water	Coral reef	Seagrass meadow	Mangrove forest
S
n	31	32	32	23
Mean	39.19	39.1	40.72	41.87
Median	39.22	39.16	40.77	41.73
Standard deviation	0.26	0.34	0.53	0.75
max	39.61	39.71	41.69	43.49
min	38.49	38.1	39.11	40.58
T
n	29	32	32	23
Mean	29.13	29.14	28.78	30.82
Median	29.54	29.53	29.88	31.03
Standard deviation	2.5	2.48	3.69	3.44
max	32.18	32.03	33.46	36.76
min	24.64	24.69	21.71	23.24
TA
n	31	31	32	23
Mean	2425	2432	2361	2443
Median	2435	2430	2352	2415
Standard deviation	69	36	67	102
max	2511	2502	2496	2717
min	2087	2361	2242	2336
DIC
n	31	32	32	23
Mean	2065	2055	1987	2076
Median	2069	2059	1979	2039
Standard deviation	41	57	78	140
max	2140	2171	2125	2466
min	1931	1909	1863	1957
pH
n	29	31	32	23
Mean	8.006	8.03	8.023	7.953
Median	8.013	8.027	8.02	7.966
Standard deviation	0.091	0.083	0.071	0.101
max	8.142	8.228	8.262	8.109
min	7.594	7.863	7.904	7.738
pCO2
n	29	31	32	23
Mean	450	419.4	404	516
Median	427.7	410.6	411	450
Standard deviation	143.3	99.7	69	173
max	1148.6	644.8	523	912
min	287	227.1	197	313
ΩAr
n	29	31	32	23
Mean	3.989	4.149	3.981	3.944
Median	4.039	4.154	3.898	4.054
Standard deviation	0.582	0.581	0.628	0.598
max	5.093	5.339	6.415	4.979
min	1.696	2.985	3.155	2.769
rTA
n	31	31	32	23
Mean	-31.61	-20.16	-191.77	-182.26
Median	-23.12	-22.4	-189.67	-181.89
Standard deviation	67.33	39.79	86.09	88.82
max	28.1	93.44	-12.23	49.39
min	-371.1	-102.35	-365.78	-347.12
rDIC
n	31	32	32	23
Mean	-5.1	-11.22	-164.91	-136.19
Median	5.58	-19.05	-193.94	-154.99
Standard deviation	37.2	52.44	91.07	126.84
max	47.16	87.92	11.77	222.39
min	-120.32	-131.07	-310.32	-269.65
rpH
n	29	31	32	23
Mean	-0.0358	-0.0121	-0.0109	-0.0392
Median	-0.0242	-0.004	-0.022	-0.0018
Standard deviation	0.0867	0.0792	0.0793	0.0992
max	0.1118	0.1544	0.2645	0.0869
min	-0.4121	-0.177	-0.1273	-0.2658
rpCO2
n	29	31	32	23
Mean	48.14	18.67	-20.31	34.83
Median	28.64	5.95	-0.67	-27.01
Standard deviation	137.84	96.01	86.98	172.27
max	710.76	235.14	112.68	419.76
min	-121.81	-137.97	-259.5	-151.93
rΩAr
n	29	31	32	23
Mean	-0.2637	-0.0957	-0.3934	-0.5743
Median	-0.1906	-0.0902	-0.5036	-0.4555
Standard Deviation	0.574	0.5772	0.6027	0.5867
max	0.8082	1.1072	2.0197	0.2561
min	-2.6171	-1.2747	-1.0546	-1.7877

## Sheet: Table S8
Table S8. Results from one-way WR-ANOVA and corresponding boot-strapped post-hoc t-tests to identify differences in medians between the four time series stations ; Transition (T), Coral reef (C), Seagrass meadow (S) and Mangrove Forest (M). Tests statistics (F for WR-ANOVA and Ψ_hat for post-hoc) and p-values (p) are reported for each individual test.
	S	T	TA	DIC	pH	pCO2	OA	rTA	rDIC	rpH	rpCO2	rOA
One-way ANOVA	77.44, <0.001	0.456, 0.664	8.80, <0.001	4.08, 0.012	1.16, 0.276	0.552, 0.587	0.794, 0.438	45.99, <0.001	33.56, <0.001	0.54, 0.600	1.50, 0.176	2.58, 0.047
Post-hoc tests
T vs C	0.664	NA	0.619	0.346	NA	NA	NA	0.911	0.154	NA	NA	0.422
T vs S	<0.001	NA	<0.001	0.001	NA	NA	NA	<0.001	<0.001	NA	NA	0.023
T vs M	<0.001	NA	0.067	0.062	NA	NA	NA	<0.001	<0.001	NA	NA	0.039
C vs S	<0.001	NA	<0.001	0.013	NA	NA	NA	<0.001	<0.001	NA	NA	0.042
C vs M	<0.001	NA	0.124	0.236	NA	NA	NA	<0.001	<0.001	NA	NA	0.065
S vs M	<0.001	NA	<0.001	0.076	NA	NA	NA	0.848	0.743	NA	NA	0.781
